# Supplementary material for: Effects of Proactive Social Distancing on COVID-19 Outbreaks in 58 Cities, China
Source: PubMed Central journal article supplement (PMC7454087; doi:10.3201/eid2609.201932), 2020-09
Supplement: 20-1932-Techapp-s1.pdf [file 20-1932-Techapp-s1.pdf]

# Effects of Proactive Social Distancing on COVID-19 Outbreaks in 58 Cities, China

## Appendix

### Supplemental Methods

We collected data from online reports published by China Center for Disease Control and Prevention and health commissions (Appendix Table 4). The data comprised 8,410 confirmed cases before February 15, 2020, across 271 cities in mainland China with known dates of symptom onset and classified as imported or locally infected. In any case, with missing symptom onset timings, we allocate a random value post the official announcement following the gamma distribution of the period from the onset of symptoms (*I*). We also aggregated data on the timing of 7 different classes of social distancing measures in 58 cities outside Hubei province (Appendix Table 1; Appendix 2).

### Estimation of $R_t$

We estimate the time-varying reproduction numbers for the outbreaks in 58 cities using the R package EpiEstim (2) based on the method of Ref (3). Given time series data for incident imported and locally-infected cases and the distribution of serial intervals, the algorithm produces the time series of  $R_t$  with medians and 95% CI. We assume the serial interval follows the gamma distribution (mean 5.11 days, SD 2.68 days (*I*)) and the length of sliding time window for an estimated 7 days (4).

### Regression Analysis

To assess the impact of intervention type and timing on the speed of containment, we applied a simple regression and variable selection method (Appendix Table 2). Specifically, we fit a linear regression model predicting the time until containment (i.e., days between symptom onset for the first reported case and the estimated 95% CI upper bound of  $R_t$  dropping below 1) as given by

$$\chi = \sum_{i=1}^8 \beta_i T_i + \epsilon$$

where  $\beta_i$  is the coefficient of the  $i$ th variable  $T_i$  and  $\epsilon$  is the intercept.

We analyze data from a subset consisting of 36 of 58 cities in mainland China that implemented all 8 interventions and contained the local outbreak by February 14, 2020. We used the best-subsets regression to identify the best fit model for all models containing  $k$ , in which  $k$  range is 1–8, and chose our final model based on the Akaike information criterion corrected for small sample sizes (5).

**Appendix Table 1.** Variable definitions for analysis of the mitigating effect of social distancing on coronavirus spread in cities in China, 2020

| Symbol                       | Definition                                                                                                                                                                     | Candidate model predictor |
|------------------------------|--------------------------------------------------------------------------------------------------------------------------------------------------------------------------------|---------------------------|
| $t_0$                        | Day of symptom onset for the first reported case                                                                                                                               | No                        |
| $t_e$                        | Day on which the earliest social distancing measure(s) was enacted                                                                                                             | No                        |
| $t_{\text{control}_{95}}$    | Day that the upper 95% CI bound of $R_t$ drops below one (without rebounding)                                                                                                  | No                        |
| $\lambda$                    | Containment period: the number of days between symptom onset of the first reported case ( $t_0$ ) and the upper 95% CI of $R_t$ dropping below 1 ( $t_{\text{control}_{95}}$ ) | No                        |
| $T_{\text{SD}\dagger}$       | Days between first reported case ( $t_0$ ) and implementation of the first social distancing measure implemented ( $t_e$ )                                                     | Yes                       |
| $T_{\text{entertainment}}$   | Days between the first reported case ( $t_0$ ) and ban on entertainment and public gatherings (e.g., bar, café, cinema)                                                        | Yes                       |
| $T_{\text{service}}$         | Days between the first reported case ( $t_0$ ) and restrictions on public services, including hospitals, schools, stores, and restaurants                                      | Yes                       |
| $T_{\text{level-1}\ddagger}$ | Days between the first reported case ( $t_0$ ) and the initiation of urban level-1 response for systematic testing and isolation of confirmed cases                            | Yes                       |
| $T_{\text{intra\_trans}}$    | Days between the first reported case ( $t_0$ ) and suspension of intracity public transport (bus and subway)                                                                   | Yes                       |
| $T_{\text{inter\_trans}}$    | Days between the first reported case ( $t_0$ ) and suspension of inbound and outbound travel (i.e., intercity rail, highway, and air travel)                                   | Yes                       |
| $T_{\text{report}}$          | Days between the first reported case ( $t_0$ ) and online posting of confirmed case reports                                                                                    | Yes                       |
| $T_{\text{assist}}$          | Days between the first reported case ( $t_0$ ) and the recruitment of governmental staff and volunteers to assist with quarantine and social distancing                        | Yes                       |

**Appendix Table 2.** Results of linear regression relating immediacy of interventions to speed of containment, China\*

| Predictors                   | Coefficient          | p value |
|------------------------------|----------------------|---------|
| Intercept                    | 14.37 (9.02, 19.72)  | 0.000   |
| $T_{\text{SD}\dagger}$       | 2.41 (0.97, 3.86)    | 0.002   |
| $T_{\text{level-1}\ddagger}$ | -1.87 (-3.14, -0.60) | 0.005   |

\*Speed of containment is defined as days until upper 95% CI of  $R_t < 1$ . We included in the regression results for 36 of 58 cities that implemented all 8 intervention measures and had sufficient data for prediction available ( $\lambda$ ) by February 14, 2020. We selected the parameters in the table from among all of the candidates in Appendix Table 1 using the best-subsets method (6) that identifies the most informative combinations of predictors with respect to the Hurvich and Tsai's Information Criterion (7). The fitted model has  $R^2 = 0.27$ ,  $p < 0.001$ .

†Days between first reported case ( $t_0$ ) and implementation of the first social distancing measure implemented ( $t_e$ ).

‡Days between the first reported case ( $t_0$ ) and the initiation of urban level-1 response for systematic testing and isolation of confirmed cases.

**Appendix Table 3.** Distribution fits for the time between the first reported case and containment ( $\lambda$ ) and time between the first reported case and the implementation of the first social distancing measure\*

| Time            | Distribution | Shape (95% CI)       | Scale (95% CI)          | Akaike's Information Criterion |
|-----------------|--------------|----------------------|-------------------------|--------------------------------|
| $\lambda$       | Gamma        | 7.63 (5.343, 10.895) | 2.694 (1.864, 3.893)    | 394.164                        |
|                 | Lognormal    | 2.956 (2.854, 3.058) | 0.389 (0.329, 0.476)    | 398.975                        |
|                 | Weibull      | 3.282 (2.682, 4.016) | 22.937 (21.119, 24.911) | 390.329                        |
| $T_{\text{SD}}$ | Gamma        | 6.121 (4.294, 8.725) | 2.079 (1.437, 3.008)    | 349.986                        |
|                 | Lognormal    | 2.46 (2.342, 2.577)  | 0.448 (0.379, 0.549)    | 357.869                        |
|                 | Weibull      | 2.981 (2.436, 3.649) | 14.244 (13.008, 15.597) | 344.642                        |

\*Data were taken from 58 cities in mainland China before February 15, 2020. Timing is calculated in terms of days from symptom onset of the first reported case in the city. Containment is defined by the first day that the estimated upper 95% CI for  $R_t$  permanently drops below 1.

**Appendix Table 4.** Data used in the analysis, which is also available at Github and can be downloaded from <https://github.com/MeyersLabUTexas/Proactive-social-distancing-in-Chinese-cities>

| City name<br>(English) | City name<br>(Chinese) | Chi | Entertainment | Service | Level-1 | Intra_<br>trans | Inter_<br>trans | Report | Assist | SD | T0 since<br>Jan. 1,<br>2020 |
|------------------------|------------------------|-----|---------------|---------|---------|-----------------|-----------------|--------|--------|----|-----------------------------|
| Sanya                  | 三亚                     | 11  | 17            | 21      | 17      | 18              | 21              | 14     | 25     | 14 | 8                           |
| Zhongshan              | 中山                     | 8   | 13            | 13      | 15      | 16              | 18              | 23     | 28     | 13 | 11                          |
| Linyi                  | 临沂                     | 20  | 17            | 17      | 16      |                 | 18              | 15     | 24     | 15 | 8                           |
| Jiujiang               | 九江                     | 37  | 23            | 23      | 20      | 23              | 26              | 20     | 29     | 20 | 3                           |
| Xinyang                | 信阳                     | 24  | 21            | 21      | 23      | 23              | 30              | 23     | 31     | 21 | 3                           |
| North Sea              | 北海                     | 16  | 14            |         | 16      | 23              | 23              | 12     | 24     | 12 | 9                           |
| Nanjing                | 南京                     | 20  | 11            | 11      | 12      |                 | 18              | 10     | 30     | 10 | 12                          |
| Nanning                | 南宁                     | 30  |               |         | 10      |                 |                 | 11     | 23     | 10 | 15                          |
| Nanchang               | 南昌                     | 25  | 15            | 15      | 11      |                 | 15              | 19     | 29     | 11 | 12                          |
| Nanyang                | 南阳                     | 22  | 20            | 20      | 22      | 22              | 22              | 30     | 30     | 20 | 4                           |
| Hefei                  | 合肥                     | 20  | 14            | 25      | 13      | 15              | 17              | 18     | 24     | 13 | 10                          |
| Harbin                 | 哈尔滨                    | 21  | 21            | 14      |         | 22              |                 | 22     |        | 14 | 13                          |
| Shangqiu               | 商丘                     | 35  | 22            | 22      |         | 26              | 26              |        |        | 22 | 2                           |
| Tianjin                | 天津                     | 28  |               | 18      | 15      | 23              | 18              | 13     | 24     | 13 | 9                           |
| Weihai                 | 威海                     | 15  | 17            | 17      | 9       | 15              | 12              | 9      | 30     | 9  | 15                          |
| Ningbo                 | 宁波                     | 20  | 6             | 6       | 6       | 10              | 10              | 12     | 27     | 6  | 17                          |
| Anqing                 | 安庆                     | 18  | 15            | 22      | 13      | 16              | 17              | 16     | 28     | 13 | 10                          |
| Yichun                 | 宜春                     | 25  | 9             | 9       | 9       | 11              | 15              | 9      | 29     | 9  | 16                          |
| Suzhou                 | 宿州                     | 30  | 13            | 19      | 12      | 16              | 15              | 15     | 31     | 12 | 12                          |
| Yueyang                | 岳阳                     | 32  | 20            | 23      | 18      | 23              | 18              | 24     | 26     | 18 | 6                           |
| Pingdingshan           | 平顶山                    | 27  | 14            | 14      | 15      |                 |                 | 20     |        | 14 | 11                          |
| Kaifeng                | 开封                     | 10  | 3             | 3       | 9       |                 |                 | 5      | 33     | 3  | 21                          |
| Zhangjiakou            | 张家口                    | 24  | 6             | 6       | 7       | 14              | 9               | 11     | 26     | 6  | 18                          |
| Xuzhou                 | 徐州                     | 28  | 17            | 17      | 17      | 20              | 20              | 19     | 30     | 17 | 7                           |
| Huizhou                | 惠州                     | 28  | 16            | 16      | 18      |                 | 20              | 14     | 28     | 14 | 9                           |
| Chengdu                | 成都                     | 25  | 20            | 20      | 20      |                 | 20              | 11     | 39     | 11 | 11                          |
| Fuzhou                 | 抚州                     | 24  | 15            | 15      | 15      | 17              | 17              | 15     | 29     | 15 | 10                          |
| Xinyu                  | 新余                     | 33  | 27            | 27      | 20      |                 | 28              | 29     | 29     | 20 | 3                           |
| Wuxi                   | 无锡                     | 22  | 11            | 9       | 9       | 13              | 11              | 8      | 30     | 8  | 15                          |
| Hangzhou               | 杭州                     | 19  | 16            | 16      | 12      | 21              | 16              | 15     | 27     | 12 | 11                          |
| Taian                  | 泰安                     | 14  | 3             | 3       | 3       | 6               | 6               | 7      | 25     | 3  | 21                          |
| Taizhou                | 泰州                     | 24  | 13            | 13      | 12      | 17              | 17              | 14     | 30     | 12 | 12                          |
| Jinan                  | 济南                     | 23  | 15            | 15      | 15      |                 | 17              | 15     | 23     | 15 | 9                           |
| Jining                 | 济宁                     | 24  | 10            | 10      | 8       | 14              | 10              | 8      | 25     | 8  | 16                          |
| Haikou                 | 海口                     | 24  | 20            | 20      | 16      |                 | 20              | 13     | 25     | 13 | 9                           |
| Huaian                 | 淮安                     | 21  | 12            | 9       | 5       | 7               | 8               | 7      | 30     | 5  | 19                          |
| Shenzhen               | 深圳                     | 15  |               |         | 23      | 28              | 28              | 28     | 28     | 23 | 1                           |
| Wenzhou                | 温州                     | 22  | 20            | 20      | 19      | 26              | 23              | 17     | 27     | 17 | 4                           |
| Weifang                | 潍坊                     | 20  | 6             | 6       | 6       | 7               | 10              | 9      | 30     | 6  | 18                          |
| Zhuhai                 | 珠海                     | 16  | 13            | 14      | 19      | 25              | 19              | 13     | 28     | 13 | 10                          |
| Yiyang                 | 益阳                     | 21  | 21            | 23      | 21      | 25              | 23              | 22     | 29     | 21 | 3                           |
| Yancheng               | 盐城                     | 20  | 18            | 19      | 15      |                 | 20              | 17     | 30     | 15 | 9                           |
| Shijiazhuang           | 石家庄                    | 18  | 17            | 17      | 14      | 17              | 17              | 12     | 26     | 12 | 10                          |
| Shaoxing               | 绍兴                     | 7   | 10            | 10      | 9       | 9               | 13              | 11     | 26     | 9  | 14                          |
| Wuhu                   | 芜湖                     | 8   | 11            |         | 10      | 17              | 13              | 12     | 26     | 10 | 14                          |
| Suzhou                 | 苏州                     | 16  | 12            | 12      | 11      | 15              | 16              | 10     | 30     | 10 | 13                          |
| Pingxiang              | 萍乡                     | 25  | 16            | 16      | 16      | 17              | 18              | 16     | 29     | 16 | 10                          |
| Quzhou                 | 衢州                     | 15  | 15            | 15      | 14      | 21              | 18              | 14     | 23     | 14 | 9                           |
| Xi'an                  | 西安                     | 19  | 14            | 17      | 15      | 18              | 16              | 13     | 28     | 13 | 10                          |
| Xuchang                | 许昌                     | 21  | 4             | 6       | 7       | 7               | 7               | 7      | 27     | 4  | 20                          |
| Ganzhou                | 赣州                     | 29  | 20            | 20      | 19      | 35              | 24              | 26     | 29     | 19 | 6                           |
| Zhengzhou              | 郑州                     | 11  | 22            | 22      | 23      | 23              | 23              | 17     | 31     | 17 | 4                           |
| Chenzhou               | 郴州                     | 11  | 13            | 13      | 12      | 16              | 16              | 11     | 30     | 11 | 12                          |
| Jinhua                 | 金华                     | 21  | 12            | 12      | 11      | 15              | 15              | 11     | 27     | 11 | 12                          |
| Changchun              | 长春                     | 13  | 13            | 13      | 13      | 16              | 14              | 11     | 26     | 11 | 12                          |
| Fuyang                 | 阜阳                     | 18  | 15            | 15      | 15      | 23              | 17              | 16     | 29     | 14 | 10                          |
| Ma'anshan              | 马鞍山                    | 10  | 10            | 20      | 9       | 13              | 12              | 11     | 42     | 9  | 15                          |
| Zhumadian              | 驻马店                    | 9   | 12            | 12      | 14      |                 | 21              | 14     | 31     | 12 | 12                          |

## References

1. Zhang J, Litvinova M, Wang W, Wang Y, Deng X, Chen X, et al. Evolving epidemiology and transmission dynamics of coronavirus disease 2019 outside Hubei province, China: a descriptive and modelling study. *Lancet Infect Dis*. 2020 Apr 2 [Epub ahead of print]. [PubMed https://doi.org/10.1016/S1473-3099\(20\)30230-9](https://doi.org/10.1016/S1473-3099(20)30230-9)
2. Cori A. EpiEstim: Estimate time varying reproduction numbers from epidemic curves. 2019 [cited 2020 Jun 1]. <https://cran.r-project.org/web/packages/EpiEstim/index.html>
3. Thompson RN, Stockwin JE, van Gaalen RD, Polonsky JA, Kamvar ZN, Demarsh PA, et al. Improved inference of time-varying reproduction numbers during infectious disease outbreaks. *Epidemics*. 2019;29:100356. [PubMed https://doi.org/10.1016/j.epidem.2019.100356](https://doi.org/10.1016/j.epidem.2019.100356)
4. Cowling BJ, Ali ST, Ng TWY, Tsang TK, Li JCM, Fong MW, et al. Impact assessment of non-pharmaceutical interventions against coronavirus disease 2019 and influenza in Hong Kong: an observational study. *Lancet Public Health*. 2020;5:e279–88. [PubMed https://doi.org/10.1016/S2468-2667\(20\)30090-6](https://doi.org/10.1016/S2468-2667(20)30090-6)
5. Hurvich CM, Tsai C-L. Regression and time series model selection in small samples. *Biometrika*. 1989;76:297–307.
6. Yang H. The case for being automatic: introducing the automatic linear modeling (LINEAR) procedure in SPSS statistics. *Multiple Linear Regression Viewpoints*. 2013;39:27–37.
7. IBM Knowledge Center. Information Criteria [cited 2020 Mar 30]. [https://www.ibm.com/support/knowledgecenter/SSLVMB\\_23.0.0/spss/tutorials/mixed\\_diet\\_info\\_02.html](https://www.ibm.com/support/knowledgecenter/SSLVMB_23.0.0/spss/tutorials/mixed_diet_info_02.html)

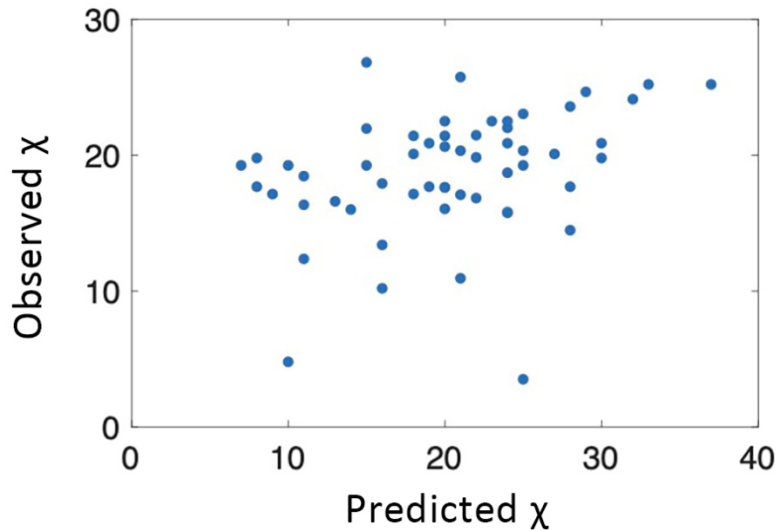

**Appendix Figure 1.** Predicted versus observed speed of containment ( $\lambda$ ) for 36 cities in mainland China based on the fitted regression model (Appendix Table 1). The data have a Pearson correlation coefficient of 0.52 ( $p < 0.001$ ).

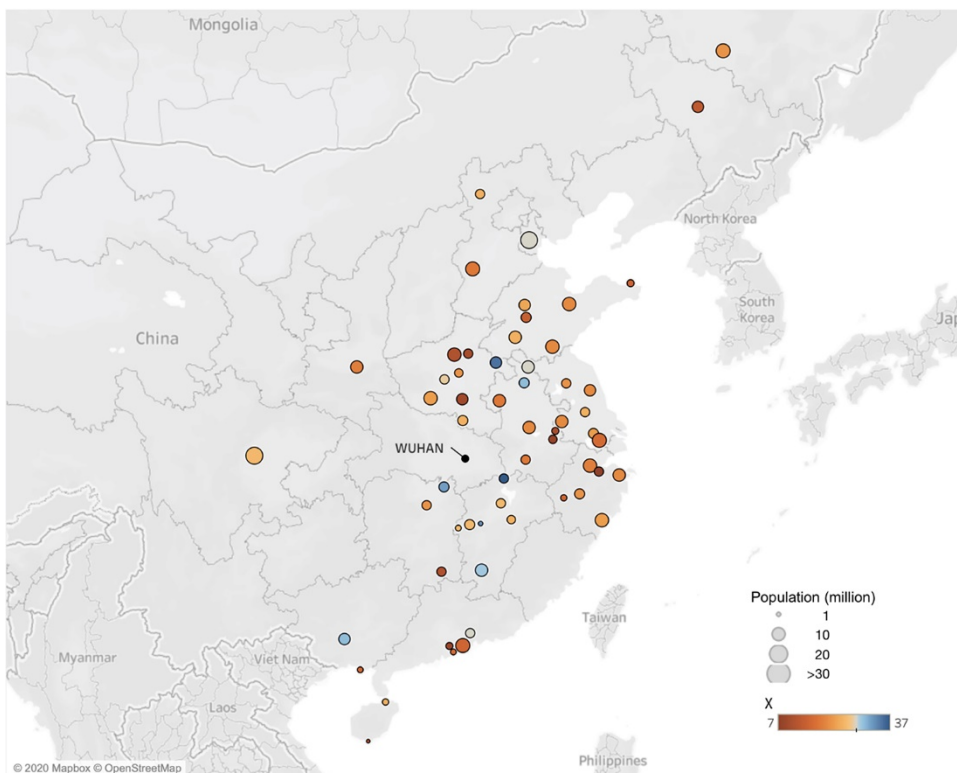

**Appendix Figure 2.** The number of days between the first reported case and containment ( $\lambda$ ) for 58 cities in mainland China that achieved containment before February 15, 2020. Outbreaks are considered contained when the estimated upper 95% CI bound of  $R_t$  drops below 1 without rebounding. Orange indicates the 48 cities that achieved containment within 4 weeks; blue indicates the 10 cities that did not.
